# Supplementary material
Source: PubMed Central journal article supplement (PMC7282917)
Supplement: rspb20200622supp1.pdf [file rspb20200622supp1.pdf]

Supplementary materials to

# Environmental variability, reliability of information and the timing of migration

Silke Bauer, John M. McNamara and Zoltan Barta

## Supplementary Material S1: Dynamic programming equations

### Terminal reward

Set  $V(i, k, N) = 0$  for all  $i = -Q, -(Q - 1), \dots, 0, 1, 2, \dots, Q$  and all  $k = 0, 1, \dots, K - 1$ .

Set  $V(i, K, n) = R(i\Delta, n\Delta)$  for all  $i = -Q, -(Q - 1), \dots, 0, 1, 2, \dots, Q$  and all  $n = 0, 1, \dots, N$ .

### Backwards step

Let  $0 \leq n \leq N - 1$ . Suppose that  $V(i, k, n + 1)$  is given for all  $i = -Q, -(Q - 1), \dots, 0, 1, 2, \dots, Q$  and all  $k = 0, 1, \dots, K$ .

for each  $i = -Q, -(Q - 1), \dots, 0, 1, 2, \dots, Q$  and each  $k = 0, 1, \dots, K - 1$ :

$$\text{Let } H_{\text{stay}} = [1 - M((n + i)\Delta, k)\Delta]V(i, k, n + 1)$$

$$\text{Let } H_{\text{leave}} = \sum_{j=-Q}^Q a_{i,j}(k + 1)V(j, k + 1, n + 1) \quad (***)$$

$$\text{Set } V(i, k, n) = \max\{H_{\text{stay}}, H_{\text{leave}}\}$$

Set  $\text{Action}(i, k, n) = 1$  if  $H_{\text{stay}} \geq H_{\text{leave}}$ , else set  $\text{Action}(i, k, n) = 0$ .

[Note migration takes one time-unit in the above, but delta is small.]

### The leaving strategy

If the optimal strategy is of the obvious simple form, then

$$L(i\Delta, k) = \Delta \sum_{n=0}^N \text{action}(i, k, n).$$

## Numerical implementation

We draw a distinction between grid time and real time. Specifically, the time-grid step is  $\Delta$ , which will typically be small. The time grid takes integer values of  $n = 0, 1, 2, \dots, N$ . These values correspond to

calendar times  $t = 0, \Delta, 2\Delta, \dots, N\Delta$ . The advancement of spring relative to the mean is assumed to lie on a grid  $i = -Q, -(Q-1), \dots, 0, 1, 2, \dots, Q$ . Grid time  $q$  corresponds to real time  $q\Delta$ .

### The transition matrices

Define the function  $f_{norm}$  by

$$f_{norm}(x, m, v) = \exp\{-(x - m)^2 / 2v\}.$$

For each  $k$  in the range  $k = 1, 2, \dots, K$ ,

$$\text{Set } v = \sigma^2(k)(1 - (\rho(k))^2).$$

For each  $i$  in the range  $i = -Q, -(Q-1), \dots, 0, 1, 2, \dots, Q$  set  $m = i\Delta\rho(k)\sigma(k) / \sigma(k-1)$

{ For each  $j$  are in the range  $j = -Q, -(Q-1), \dots, 0, 1, 2, \dots, Q$  set  $x = j\Delta$ .

$$\text{Set } \tilde{a}_{i,j}(k) = f_{norm}(x, m, v) . \}$$

$$\text{Set } sum = \sum_{j=-Q}^Q \tilde{a}_{i,j}(k) .$$

For each  $j$  in the range  $j = -Q, -(Q-1), \dots, 0, 1, 2, \dots, Q$  set  $a_{i,j}(k) = \tilde{a}_{i,j}(k) / sum$ .

[We can interpret these variables as follows:

$$a_{i,j}(k) = P(Y(k) = \Delta j \vee Y(k-1) = \Delta i),$$

and  $A(k) \equiv (a_{i,j}(k))$  is the transition matrix related the (grid values of) advancement of spring at location  $k-1$  to that at  $k$ .]

Figure S1 – Relation between landscape  $\rho$  and  $\rho(k)$

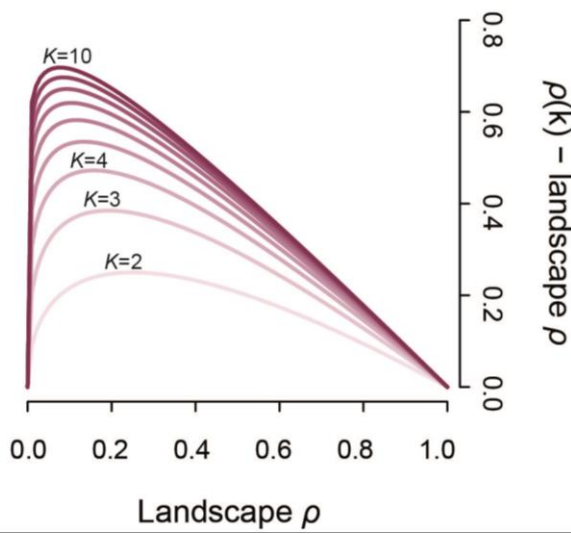

Fig. S1. As the landscape  $\rho$  is the product of all  $\rho(k)$ 's, changing the number of sites,  $K$ , while keeping the landscape  $\rho$  constant, changes the correlation between successive sites,  $\rho(k)$ . If the landscape  $\rho$  is either very high or very low, the correlations between successive sites,  $\rho(k)$ , hardly differ from landscape  $\rho$ , while the greatest differences appear for low to intermediate  $\rho$  and these differences increase further with more sites (darker lines).

Figure S2 – Reproductive values for varying number of sites and sigma

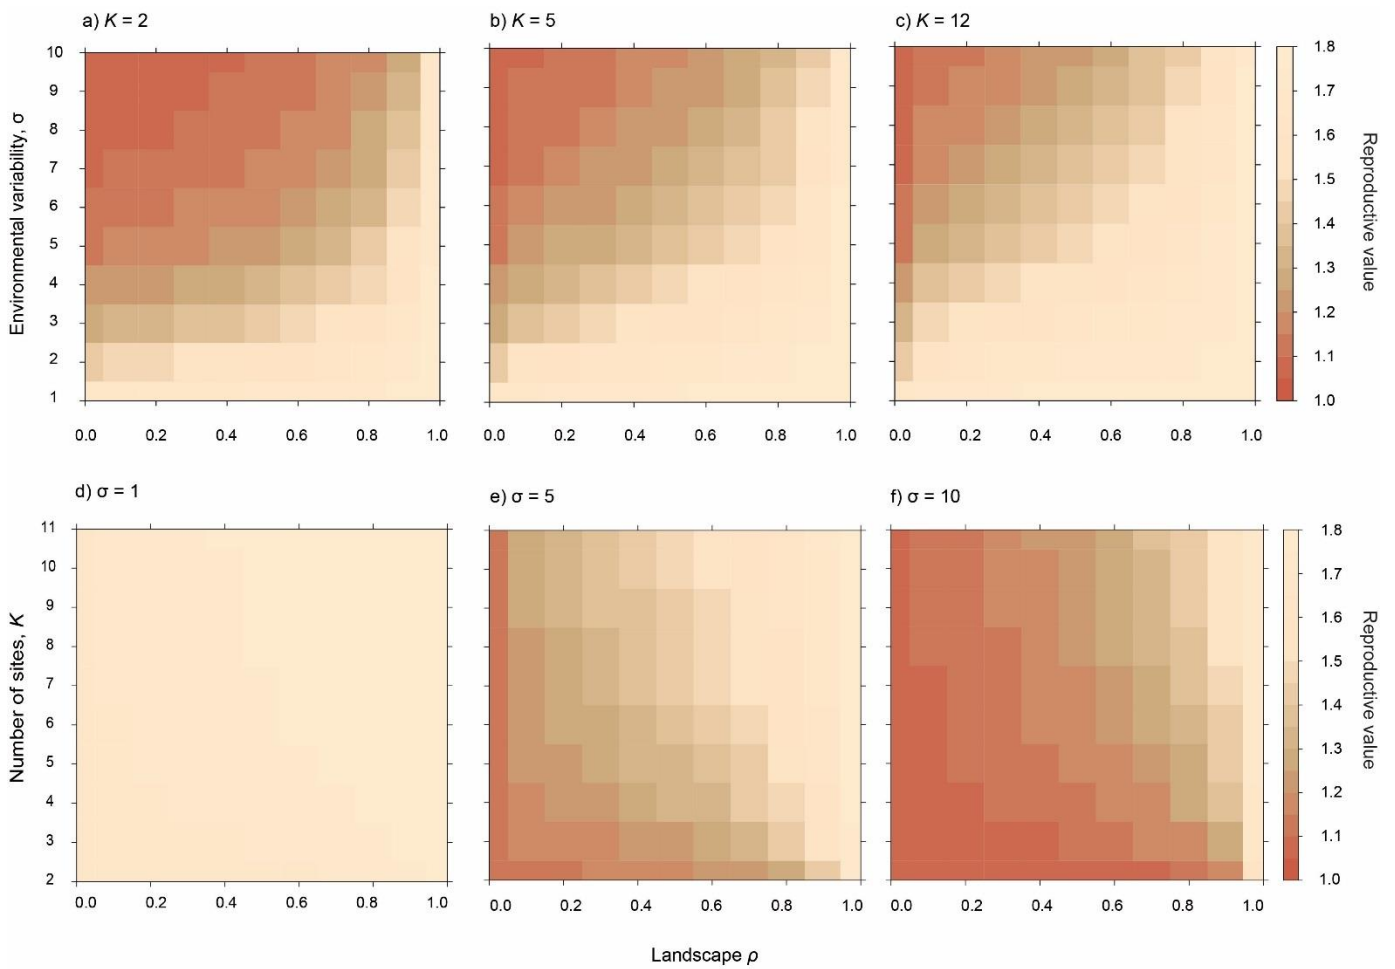

Fig. S2. Reproductive values over a gradient of overall predictability (landscape  $\rho$ ) and environmental variability (upper panel) and varying number of sites (lower panel), respectively.

Adding intermediate sites does not yield any fitness-benefit in almost constant environment (d) while it clearly increases reproductive values when environments become more variable (e-f).
